# Supplementary material for: Synthesis, characterization and solution behavior of a systematic series of pentapyridyl-supported RuII complexes: comparison to bimetallic analogs
Source: Royal Society of Chemistry journal article supplement (doi:10.1039/c7dt01847a), 2017-01-01
Supplement: c7dt01847a1.pdf [file c7dt01847a1.pdf]

# **Synthesis, characterization and solution behavior of a systematic series of pentapyridyl-supported Ru<sup>II</sup> complexes: Comparison to bimetallic analogs**

Sungho V. Park, John F. Berry\*

Department of Chemistry, University of Wisconsin – Madison, 1101 University Avenue,  
Madison, Wisconsin 53706

\*E-mail: berry@chem.wisc.edu

## **Contents**

|                                              |    |
|----------------------------------------------|----|
| Modified Syntheses for <b>2</b> and <b>3</b> | S2 |
| NMR Spectra                                  | S3 |
| CV Data                                      | S5 |
| Crystal Structure Tables                     | S7 |
| Calculation of Thermodynamic Parameters      | S8 |
| Reference                                    | S9 |

Modified preparation of **2**. A mixture of  $\text{Py}_5\text{Me}_2$  (561.7 mg, 1.266 mmol) and  $\text{RuCl}_3 \cdot 3\text{H}_2\text{O}$  (351.8 mg, 1.345 mmol) was refluxed in 120 mL of ethanol under  $\text{N}_2$  for 24 hours. After cooling the mixture to room temperature, the solvent was removed and water was added to the residue. The mixture was filtered over a fine frit, and to the yellow filtrate was added excess  $\text{NH}_4\text{PF}_6$ . The resulting dark yellow precipitate was collected and washed with water. Yield: 473.8 mg (52%).

Modified preparation of **3**. To 412.7 mg of **1** (0.5692 mmol) in 300 mL of ultrapure water was added excess  $\text{AgPF}_6$ . The mixture was refluxed in air for 3 hours and filtered hot over celite to remove unreacted **1**. The filtrate was concentrated with a rotary evaporator and the crude product was washed with cold water prior to recrystallization in a mixture of water and acetone to give yellow crystals. Yield: 215.5 mg (44%).

Figure S1. NMR spectrum of  $[\text{Ru}(\text{Py}_5\text{Me}_2)(\text{N}_3)](\text{PF}_6)$  (**1**) in  $\text{CD}_3\text{CN}$ .

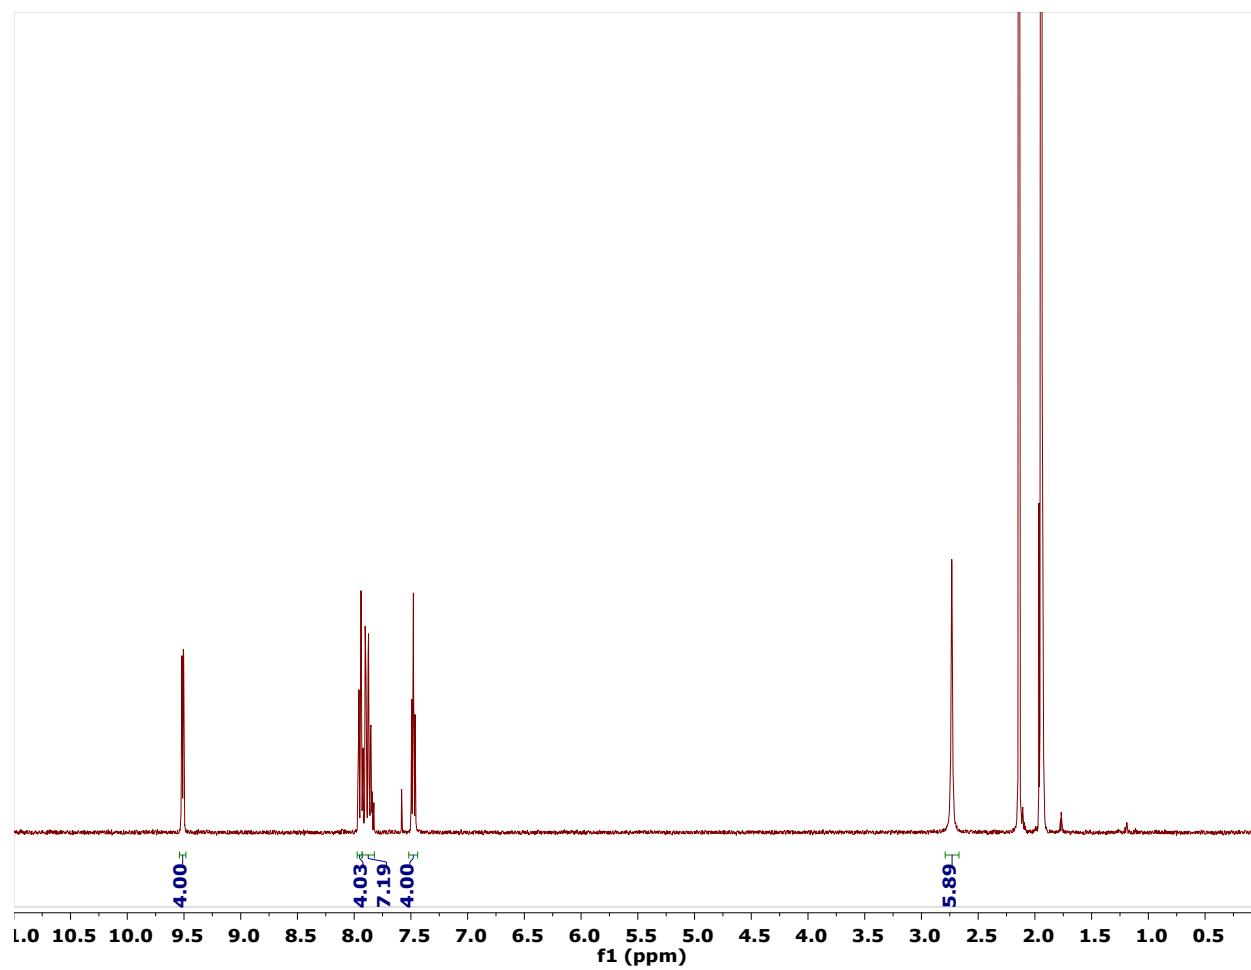

Figure S2. NMR spectrum of  $[\text{Ru}(\text{Py}_5\text{Me}_2)(\text{MeCN})](\text{PF}_6)_2$  (**4**) in  $\text{CD}_3\text{CN}$ .

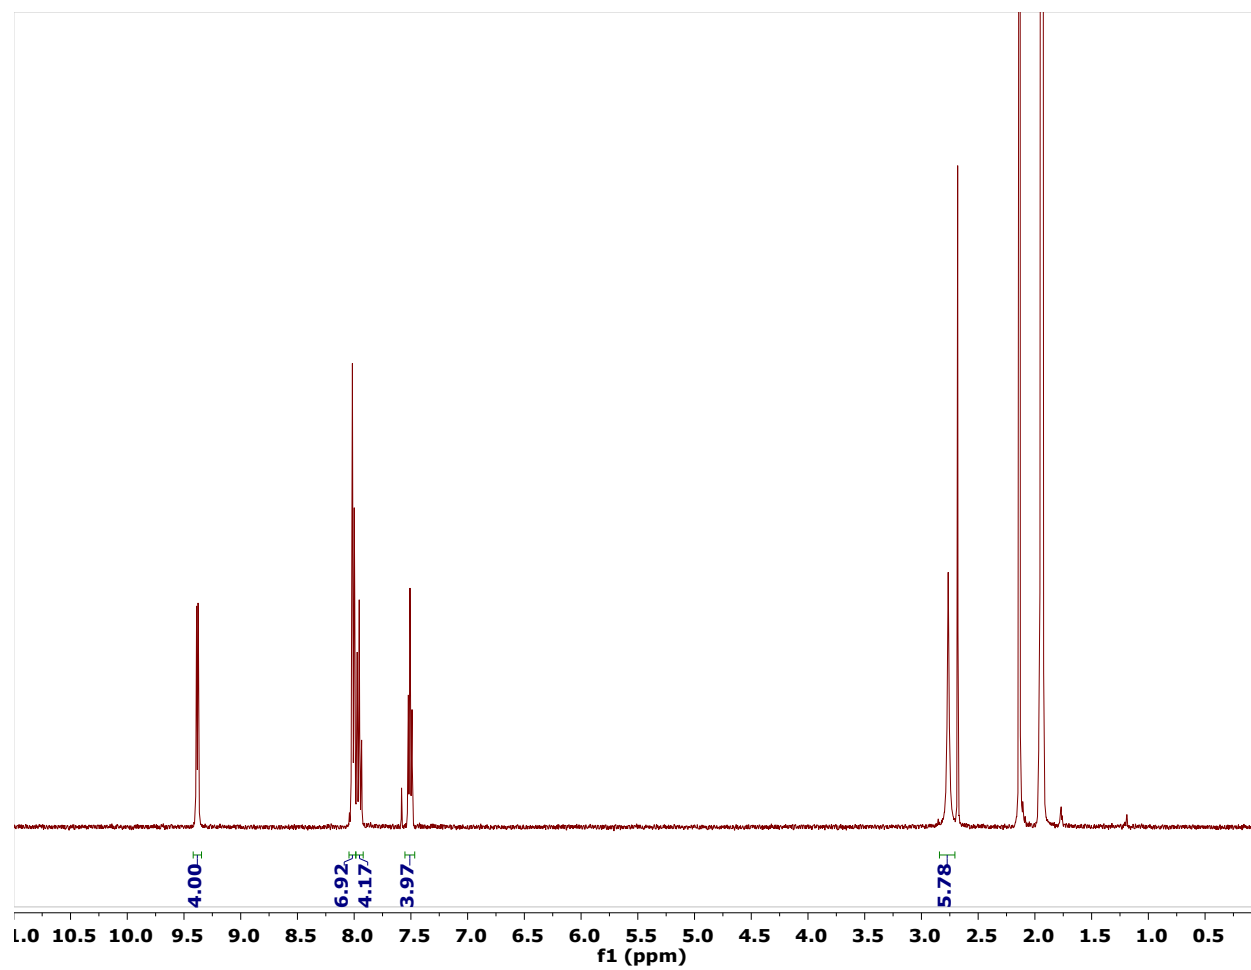

Figure S3. CV raw data for  $[\text{Ru}(\text{Py}_5\text{Me}_2)(\text{N}_3)](\text{PF}_6)$  (**1**) in  $\text{CH}_3\text{CN}$ .

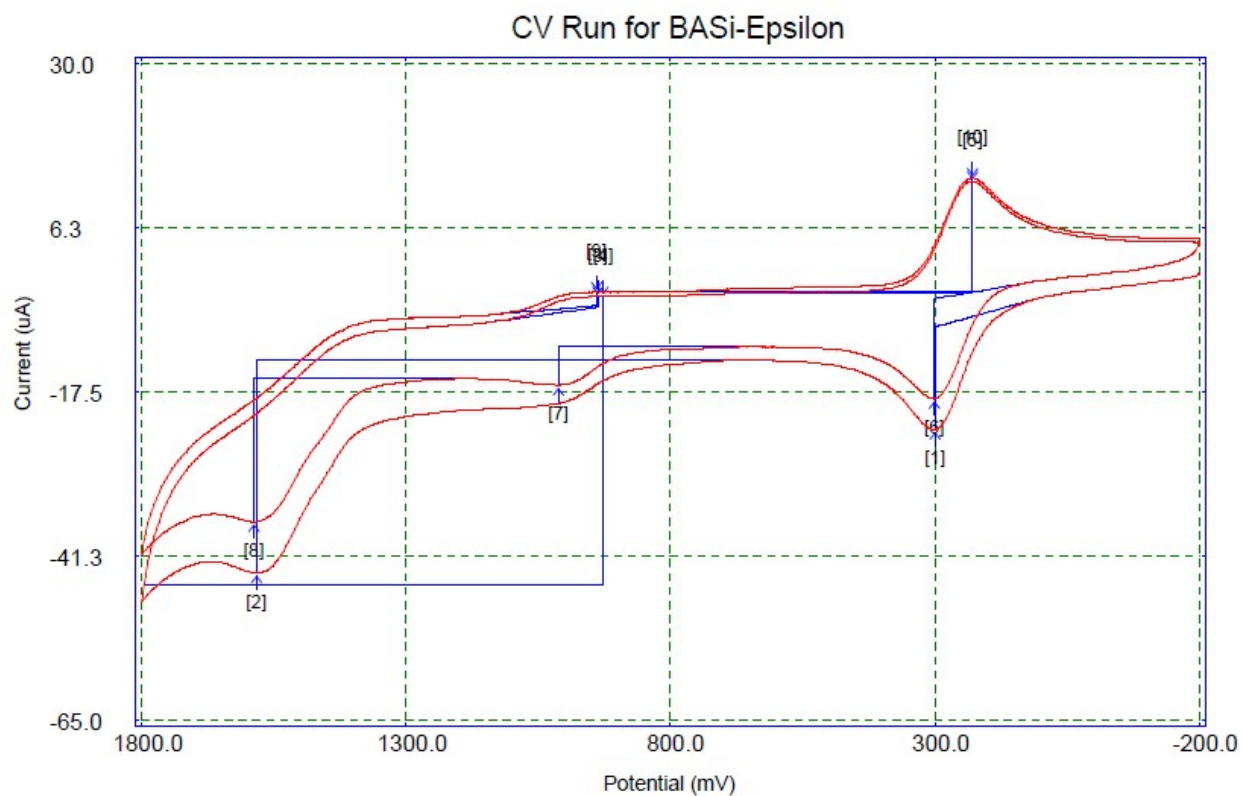

### Peak Data:

peak [1] @ 300 [mV], 14.7860 (uA), 9.7211 (uC)  
 peak [2] @ 1582 [mV], 30.7866 (uA), 75.7944 (uC)  
 peak [3] @ 937 [mV], 1.4740 (uA), 1.9424 (uC)  
 peak [4] @ 928 [mV], 41.6449 (uA), 273.5188 (uC)  
 peak [5] @ 229 [mV], 16.2051 (uA), 11.6376 (uC)  
 peak [6] @ 301 [mV], 14.4381 (uA), 9.1390 (uC)  
 peak [7] @ 1012 [mV], 5.5482 (uA), 5.3944 (uC)  
 peak [8] @ 1587 [mV], 20.7156 (uA), 25.0665 (uC)  
 peak [9] @ 940 [mV], 2.0447 (uA), 2.2861 (uC)  
 peak [10] @ 229 [mV], 16.5133 (uA), 14.0487 (uC)

Figure S4. CV raw data for  $[\text{Ru}(\text{Py}_5\text{Me}_2)(\text{Cl})](\text{PF}_6)$  (**2**) in  $\text{CH}_3\text{CN}$ .

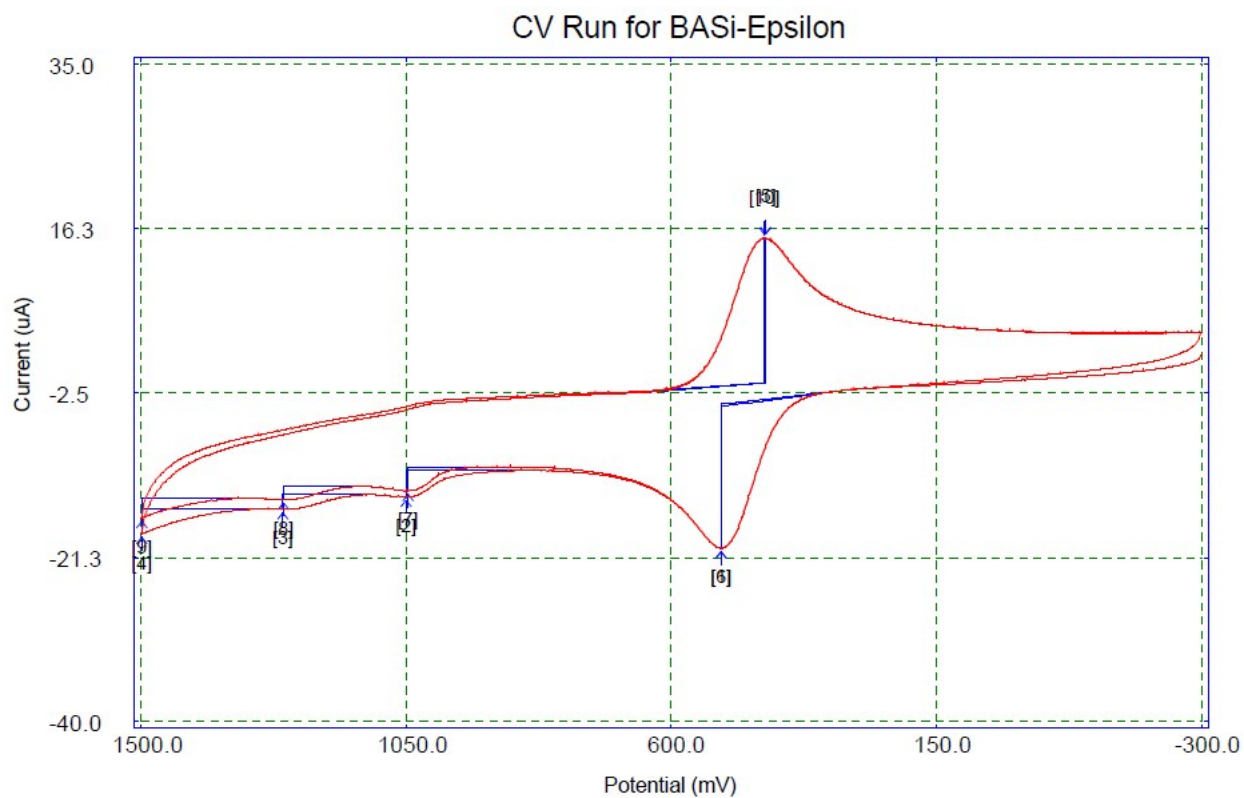

### Peak Data:

peak [1] @ 516 [mV], 16.1440 (uA), 10.3923 (uC)  
 peak [2] @ 1050 [mV], 3.0030 (uA), 1.8449 (uC)  
 peak [3] @ 1259 [mV], 1.6815 (uA), 1.1315 (uC)  
 peak [4] @ 1499 [mV], 2.6276 (uA), 1.7675 (uC)  
 peak [5] @ 440 [mV], 16.4492 (uA), 10.5065 (uC)  
 peak [6] @ 515 [mV], 16.4523 (uA), 10.5221 (uC)  
 peak [7] @ 1047 [mV], 2.7192 (uA), 1.2835 (uC)  
 peak [8] @ 1258 [mV], 1.4893 (uA), 0.9050 (uC)  
 peak [9] @ 1499 [mV], 2.1027 (uA), 1.2066 (uC)  
 peak [10] @ 442 [mV], 16.5286 (uA), 10.7109 (uC)

## Crystal Structure Tables

|                                             | 1                                                                         | 3                                                                                                              | 4                                                                                |
|---------------------------------------------|---------------------------------------------------------------------------|----------------------------------------------------------------------------------------------------------------|----------------------------------------------------------------------------------|
| Compound                                    | [Ru(Py <sub>5</sub> Me <sub>2</sub> )(N <sub>3</sub> )](PF <sub>6</sub> ) | [Ru(Py <sub>5</sub> Me <sub>2</sub> )(OH <sub>2</sub> )](PF <sub>6</sub> ) <sub>2</sub><br>• 2H <sub>2</sub> O | [Ru(Py <sub>5</sub> Me <sub>2</sub> )(MeCN)](PF <sub>6</sub> ) <sub>2</sub>      |
| Empirical formula                           | C <sub>29</sub> H <sub>25</sub> F <sub>6</sub> N <sub>8</sub> PRu         | C <sub>29</sub> H <sub>31</sub> F <sub>12</sub> N <sub>5</sub> O <sub>3</sub> P <sub>2</sub> Ru                | C <sub>31</sub> H <sub>28</sub> F <sub>12</sub> N <sub>6</sub> P <sub>2</sub> Ru |
| Formula weight                              | 731.61                                                                    | 888.60                                                                                                         | 875.60                                                                           |
| Temperature/K                               | 100.01                                                                    | 100.0                                                                                                          | 100.0                                                                            |
| Crystal system                              | triclinic                                                                 | triclinic                                                                                                      | triclinic                                                                        |
| Space group                                 | <i>P</i> $\bar{1}$                                                        | <i>P</i> $\bar{1}$                                                                                             | <i>P</i> $\bar{1}$                                                               |
| a/Å                                         | 9.805(4)                                                                  | 11.563(4)                                                                                                      | 11.443(4)                                                                        |
| b/Å                                         | 12.202(4)                                                                 | 12.841(5)                                                                                                      | 12.524(4)                                                                        |
| c/Å                                         | 12.256(5)                                                                 | 13.303(5)                                                                                                      | 13.131(5)                                                                        |
| $\alpha$ /°                                 | 94.78(1)                                                                  | 82.41(1)                                                                                                       | 110.34(2)                                                                        |
| $\beta$ /°                                  | 99.50(1)                                                                  | 65.52(1)                                                                                                       | 108.48(1)                                                                        |
| $\gamma$ /°                                 | 106.99(2)                                                                 | 64.36(2)                                                                                                       | 90.75(1)                                                                         |
| Volume/Å <sup>3</sup>                       | 1369.6(9)                                                                 | 1618(1)                                                                                                        | 1657(1)                                                                          |
| Z                                           | 2                                                                         | 2                                                                                                              | 2                                                                                |
| $\rho_{\text{calc}}$ /g/cm <sup>3</sup>     | 1.774                                                                     | 1.824                                                                                                          | 1.755                                                                            |
| $\mu$ /mm <sup>-1</sup>                     | 0.710                                                                     | 0.695                                                                                                          | 0.672                                                                            |
| F(000)                                      | 736.0                                                                     | 892.0                                                                                                          | 876.0                                                                            |
| Crystal size/mm <sup>3</sup>                | 0.22 × 0.05 × 0.05                                                        | 0.409 × 0.237 × 0.044                                                                                          | 0.095 × 0.051 × 0.01                                                             |
| Radiation                                   | MoK $\alpha$ ( $\lambda$ = 0.71073)                                       | MoK $\alpha$ ( $\lambda$ = 0.71073)                                                                            | MoK $\alpha$ ( $\lambda$ = 0.71073)                                              |
| 2 $\Theta$ range for data collection/°      | 3.402 to 52.808                                                           | 3.37 to 55.026                                                                                                 | 3.502 to 52.888                                                                  |
| Index ranges                                | -12 ≤ h ≤ 12, -15 ≤ k ≤ 15, -15 ≤ l ≤ 15                                  | -14 ≤ h ≤ 15, -16 ≤ k ≤ 16, -17 ≤ l ≤ 17                                                                       | -14 ≤ h ≤ 14, -15 ≤ k ≤ 15, -16 ≤ l ≤ 16                                         |
| Reflections collected                       | 20179                                                                     | 32212                                                                                                          | 29045                                                                            |
| Independent reflections                     | 5604 [R <sub>int</sub> = 0.0785, R <sub>sigma</sub> = 0.0802]             | 7421 [R <sub>int</sub> = 0.0734, R <sub>sigma</sub> = 0.0777]                                                  | 6829 [R <sub>int</sub> = 0.0626, R <sub>sigma</sub> = 0.0639]                    |
| Data/restraints/parameters                  | 5604/0/408                                                                | 7421/104/543                                                                                                   | 6829/0/472                                                                       |
| Goodness-of-fit on F <sup>2</sup>           | 1.022                                                                     | 1.024                                                                                                          | 1.036                                                                            |
| Final R indexes [I ≥ 2 $\sigma$ (I)]        | R <sub>1</sub> = 0.0546, wR <sub>2</sub> = 0.1213                         | R <sub>1</sub> = 0.0472, wR <sub>2</sub> = 0.1168                                                              | R <sub>1</sub> = 0.0391, wR <sub>2</sub> = 0.0860                                |
| Final R indexes [all data]                  | R <sub>1</sub> = 0.0776, wR <sub>2</sub> = 0.1303                         | R <sub>1</sub> = 0.0795, wR <sub>2</sub> = 0.1250                                                              | R <sub>1</sub> = 0.0608, wR <sub>2</sub> = 0.0906                                |
| Largest diff. peak/hole / e Å <sup>-3</sup> | 1.17/-0.47                                                                | 0.81/-0.58                                                                                                     | 0.60/-0.97                                                                       |

### Calculation of Thermodynamic Parameters

$K_{eq}$  for  $CD_3CN$  substitution from **3**. A known concentration of **3** in  $CD_3CN$  was used for NMR analysis.

The peak integration values corresponding to  $[Ru(Py_5Me_2)(OH_2)]^{2+}$ ,  $[Ru(Py_5Me_2)(CD_3CN)]^{2+}$  and  $H_2O$  were respectively normalized and used in the following equation:

$$K_{eq} = \frac{[[Ru^{II}(Py_5Me_2)(CD_3CN)]^{2+}][H_2O]}{[[Ru^{II}(Py_5Me_2)(H_2O)]^{2+}]}$$

$K_{eq}$  for cross reaction in **1** and **2**.  $K$  values were calculated according to the formula  $K = e^{F(\Delta E)/RT}$  as described in the reference.<sup>1</sup> Signs of the  $E_{1/2}$  values were flipped to account for oxidations; hence,  $\Delta E = -E_{1/2}(Ru-X) + E_{1/2}(Ru-MeCN)$ .



## References

- 1 S. W. Feldberg and L. Jetic, *J. Phys. Chem.*, 1972, **76**, 2439–2446.
